# Supplementary material for: Masking specific effects of ionic liquid constituents at the solid–liquid interface by surface functionalization
Source: Royal Society of Chemistry journal article supplement (doi:10.1039/d0cp02805c), 2020-01-01
Supplement: d0cp02805c1.pdf [file d0cp02805c1.pdf]

## Electronic Supplementary Information (ESI)

### **Masking specific effects of ionic liquid constituents at the solid-liquid interface by surface functionalization**

Bojana Katana,<sup>a‡</sup> Dóra Takács,<sup>a‡</sup> Felix D. Bobbink,<sup>b</sup> Paul J. Dyson,<sup>b</sup> Nizar B. Alsharif,<sup>a</sup> Matija Tomšič<sup>c</sup> and Istvan Szilagyi<sup>\*a</sup>

*<sup>a</sup>MTA-SZTE Lendület Biocolloids Research Group, Interdisciplinary Excellence Centre, Department of Physical Chemistry and Materials Science, University of Szeged, H-6720 Szeged, Hungary*

*<sup>b</sup>Institute of Chemical Sciences and Engineering, École Polytechnique Fédérale de Lausanne (EPFL), CH-1015 Lausanne, Switzerland*

*<sup>c</sup>Faculty of Chemistry and Chemical Technology, University of Ljubljana, Večna pot 113, SI-1000 Ljubljana, Slovenia*

<sup>‡</sup>These authors contributed equally to the work.

<sup>\*</sup>Corresponding author. Email: szistvan@chem.u-szeged.hu. Tel.: +36 62 343255.

## Refractometry

The refractive index ( $n$ ) of the IL solutions was measured with an Abbemat 3200 automatic one-wavelength refractometer (Anton Paar, Austria) at a wavelength of 589 nm. For the evaluation of the light scattering data, the  $n$  values were interpolated with a linear fit according to

$$n = c_{IL}a + b \quad (\text{S1})$$

where  $c_{IL}$  is the molar concentration of the ILs, while  $a$  and  $b$  are the fitting parameters given in Table S1.

## Viscosimetry

The viscosity ( $\eta$ ) data of the IL solutions were measured with a traditional glass capillary viscometer in flow-through mode. For later calculations, the viscosity data were interpolated by following the protocol detailed in H. D. B. Jenkins et al., *Chem. Rev.*, 1995, **95**, 2695-2724 as

$$\eta/\eta_0 = 1 + A\sqrt{c_{IL}} + Bc_{IL} + Dc_{IL}^2 \quad (\text{S2})$$

where  $\eta_0$  is the viscosity of water ( $8.90 \times 10^{-4}$  Pa·s at the respective temperature), while  $A$ ,  $B$  and  $D$  are constants listed in Table S1.

**Table S1.** Fitting parameters used to interpolate the refractive indices and viscosities of the IL solutions.

| Composition         | Refractive Index <sup>a</sup> |         | Viscosity <sup>b</sup>   |                        |                        |
|---------------------|-------------------------------|---------|--------------------------|------------------------|------------------------|
|                     | $a$ (M <sup>-1</sup> )        | $b$     | $A$ (M <sup>-1/2</sup> ) | $B$ (M <sup>-1</sup> ) | $D$ (M <sup>-2</sup> ) |
| BMIMAc              | $3.01 \times 10^{-5}$         | 1.33247 | 0.0029                   | $6.72 \times 10^{-9}$  | $1.02 \times 10^{-6}$  |
| BMIMNO <sub>3</sub> | $2.86 \times 10^{-5}$         | 1.33250 | 0.0029                   | $-3.4 \times 10^{-10}$ | $3.66 \times 10^{-7}$  |
| BMIMBr              | $3.46 \times 10^{-5}$         | 1.33248 | 0.0029                   | $-3.3 \times 10^{-10}$ | $4.17 \times 10^{-7}$  |
| BMIMCl              | $2.92 \times 10^{-5}$         | 1.33248 | 0.0029                   | $-1.0 \times 10^{-4}$  | $7.76 \times 10^{-7}$  |

Fitting parameters of equations S1<sup>a</sup> and S2<sup>b</sup>.

**Table S2.** Characteristic aggregation and charge data of AL and SL-IP-2 particles measured in KCl and IL solutions.

| Salts               | AL                      |                                            |                           | SL-IP-2                 |                                            |                           |
|---------------------|-------------------------|--------------------------------------------|---------------------------|-------------------------|--------------------------------------------|---------------------------|
|                     | $CCC$ (mM) <sup>a</sup> | $\sigma$ (mC/m <sup>2</sup> ) <sup>b</sup> | $\zeta$ (mV) <sup>c</sup> | $CCC$ (mM) <sup>a</sup> | $\sigma$ (mC/m <sup>2</sup> ) <sup>b</sup> | $\zeta$ (mV) <sup>c</sup> |
| KCl                 | 80                      | 3.5                                        | 5.4                       | 90                      | 4.5                                        | 6.2                       |
| BMIMAc              | 6                       | 0.5                                        | 2.8                       | 100                     | 7.5                                        | 10.0                      |
| BMIMNO <sub>3</sub> | 40                      | 2.5                                        | 5.5                       | 100                     | 7.5                                        | 10.0                      |
| BMIMBr              | 50                      | 3.0                                        | 5.9                       | 100                     | 7.5                                        | 10.0                      |
| BMIMCl              | 90                      | 6.0                                        | 8.3                       | 100                     | 7.5                                        | 10.0                      |

<sup>a</sup>Critical coagulation concentration calculated by equation 10. <sup>b</sup>Surface charge density determined with equation 2. <sup>c</sup>Zeta potential at the  $CCC$ .

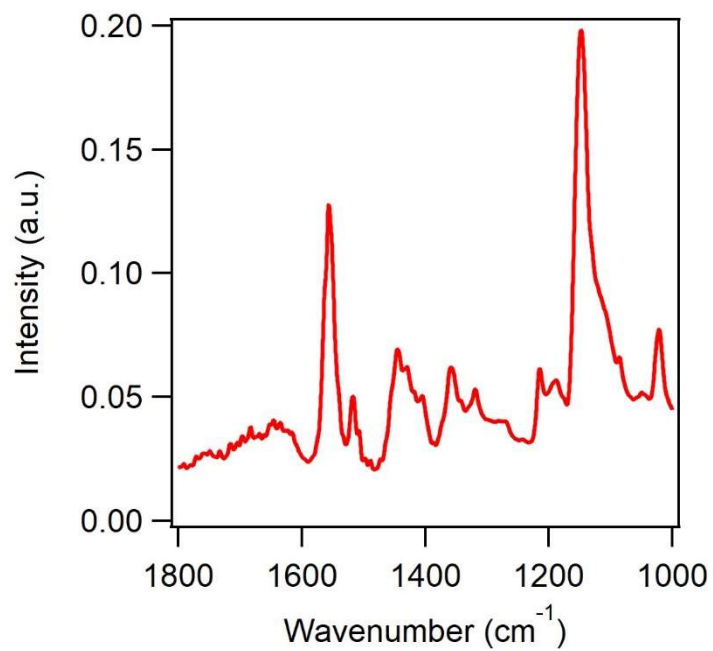

**Fig. S1** FT-IR spectrum of the IP-2 polymer synthesized using the protocol described in Zhong et al., *ChemSusChem*, 2017, **10**, 2728-2735.

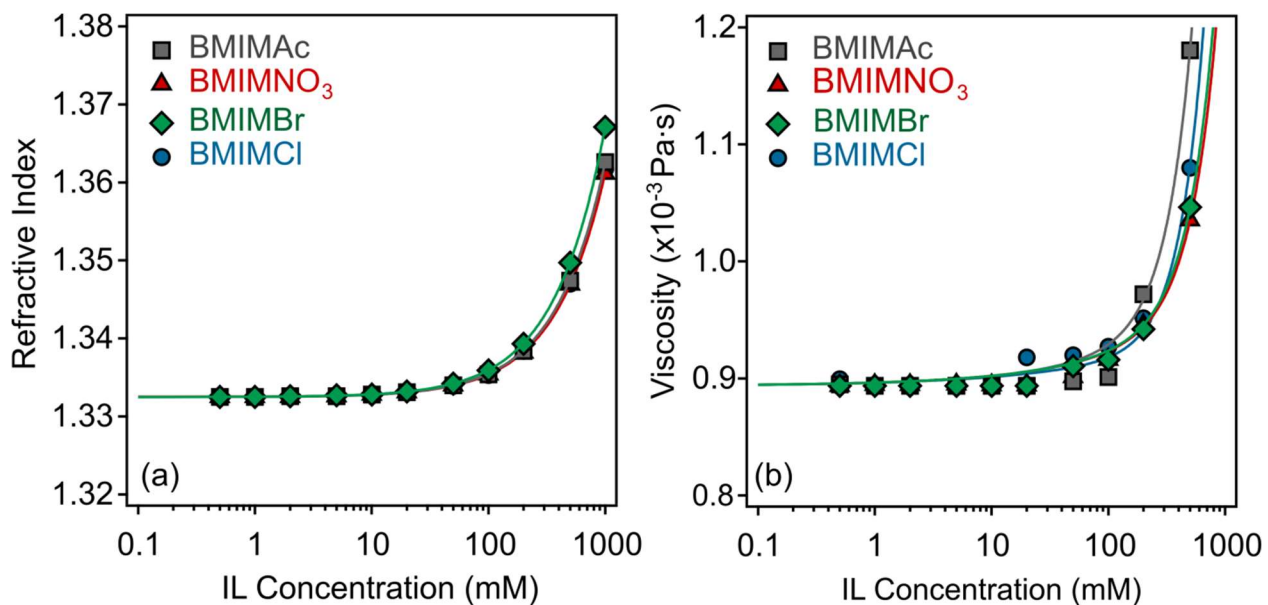

**Fig. S2** Refractive indices (a) and viscosities (b) of aqueous IL (BMIMAc, BMIMNO<sub>3</sub>, BMIMBr and BMIMCl) solutions of different concentrations at pH 4. The solid lines are fits using equations S1 (a) and S2 (b) and they were applied for data interpolation.

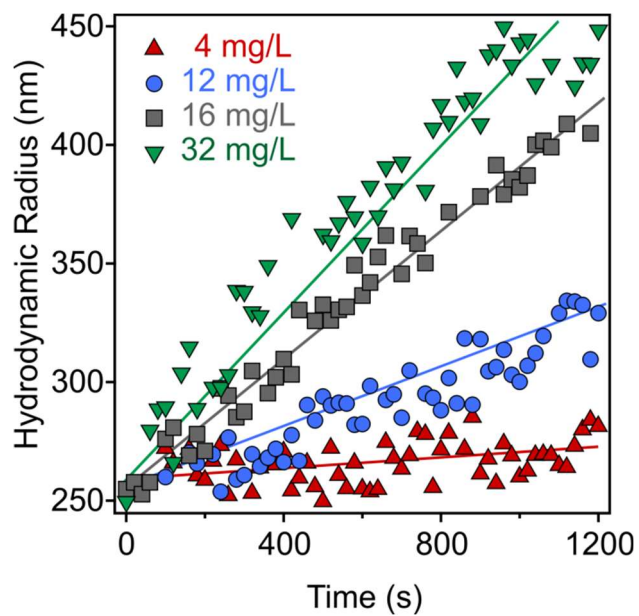

**Fig. S3** Time-resolved DLS measurements at different AL concentrations in 1 M KCl at pH 4. The solid lines are linear fits used to calculate the aggregation rate constants, which were obtained using equation 7.

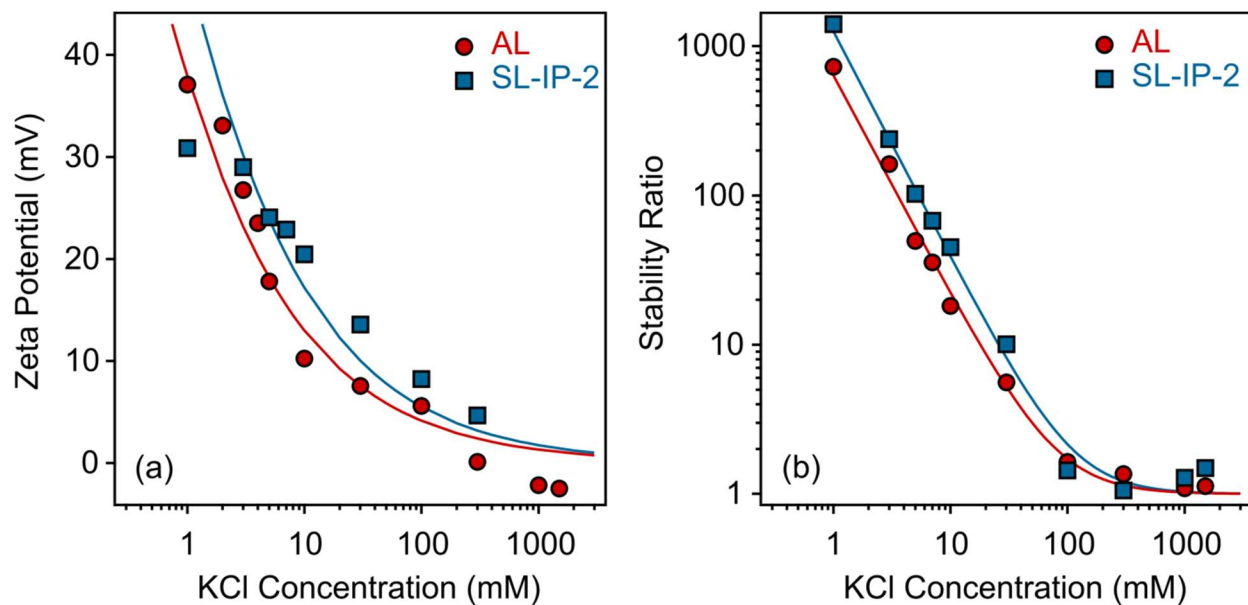

**Fig. S4** Zeta potential (a) and stability ratio (b) of AL (red circles) and SL-IP-2 (blue squares) particles at different KCl concentrations. The measurements were performed at pH 4. The lines are the results of calculations using equations 2 (a) and 10 (b).



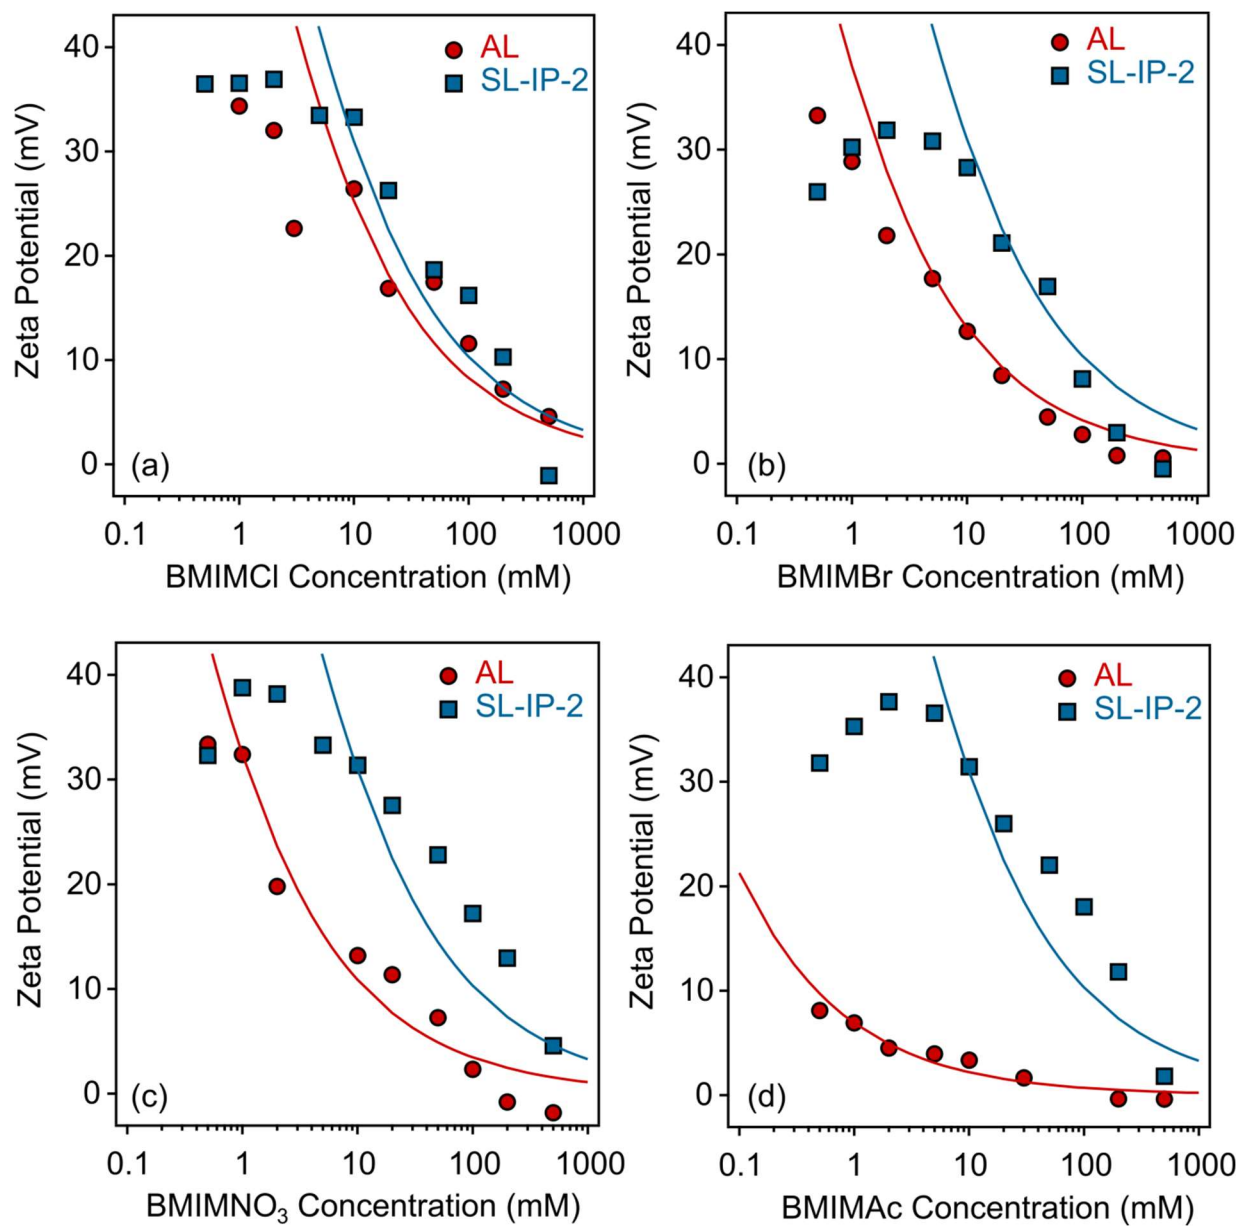

**Fig. S5** Zeta potentials of AL (red circles) and SL-IP-2 (blue squares) particles as a function of the concentration of BMIMCl (a), BMIMBr (b), BMIMNO<sub>3</sub> (c) and BMIMAc (d) at pH 4. The solid lines were calculated with equation 2.

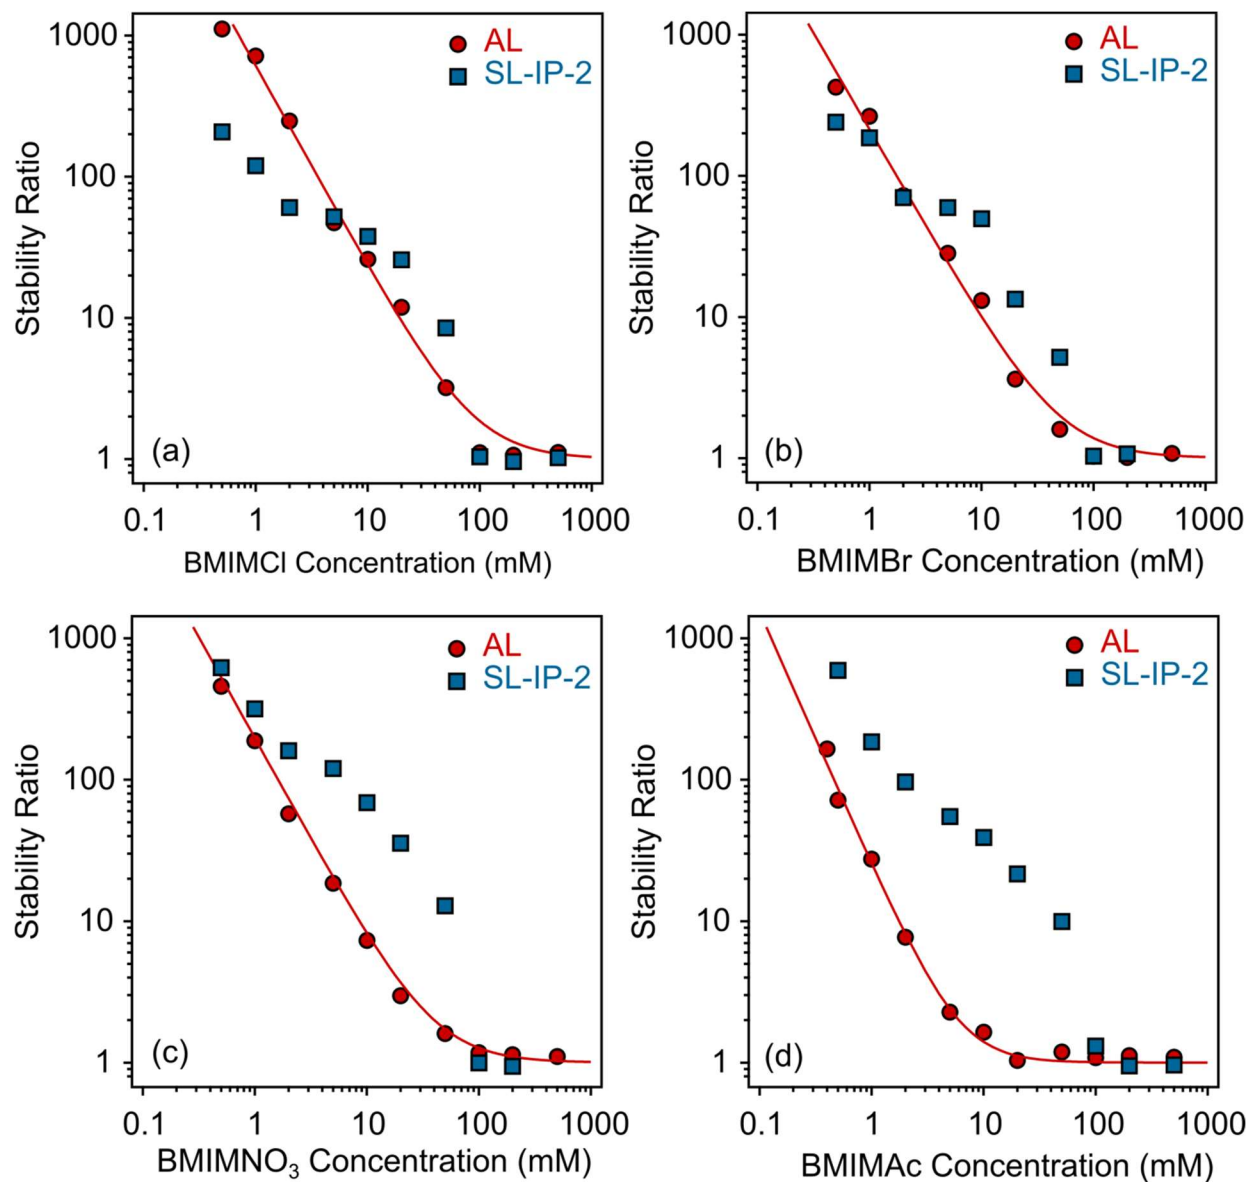

**Fig. S6** Stability ratios of AL (red circles) and SL-IP-2 (blue squares) as a function of the concentration of BMIMCl (a), BMIMBr (b), BMIMNO<sub>3</sub> (c) and BMIMAc (d) at pH 4. The solid lines were calculated with equation 10.
